# Supplementary material
Source: PubMed Central journal article supplement (PMC7079273)
Supplement: UEG878974_Supplemental_Material.pdf [file UEG878974_Supplemental_Material.pdf]

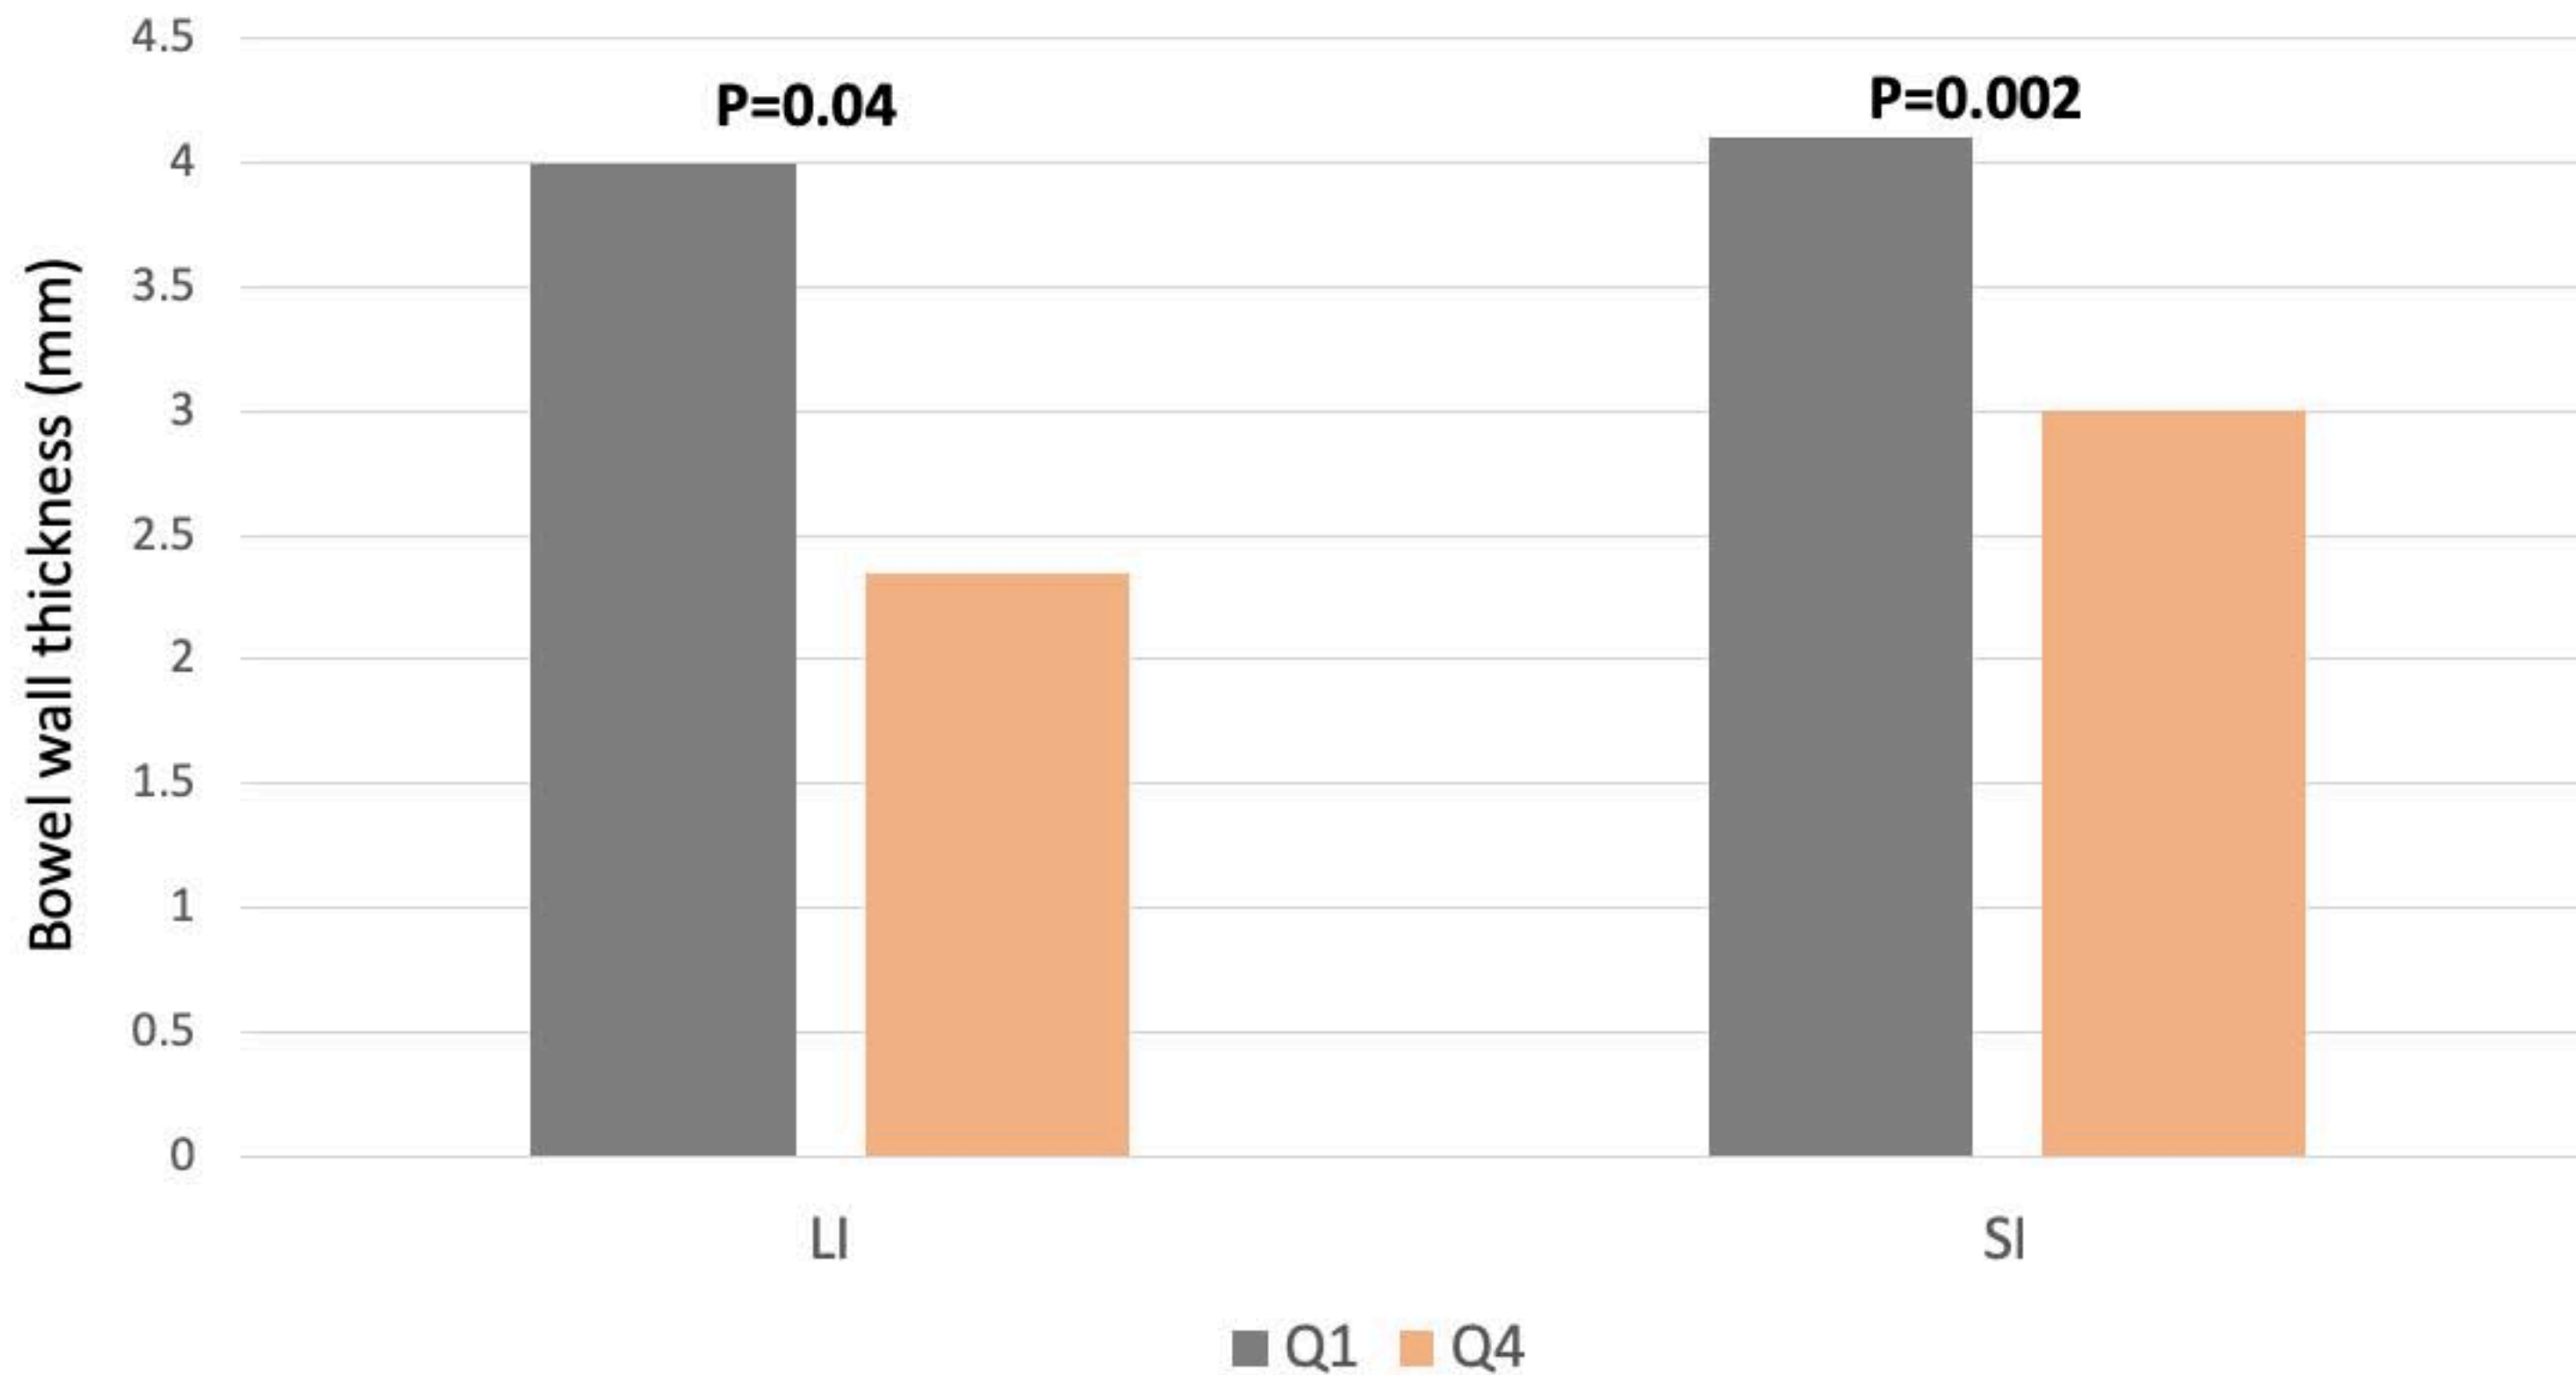

Supplementary Figure 1: LI, SI thickness in patients with adalimumab TL in the first, versus fourth quartile.

LI - large intestine, SI – small intestine.
